# Supplementary material for: Vortex-assisted natural deep eutectic solvent dispersive liquid–liquid microextraction based on the solidification of a floating organic drop for the determination of benzoic acid and sorbic acid in condiments
Source: Royal Society of Chemistry journal article supplement (doi:10.1039/d1ay01218e), 2021-01-01
Supplement: d1ay01218e1.pdf [file d1ay01218e1.pdf]

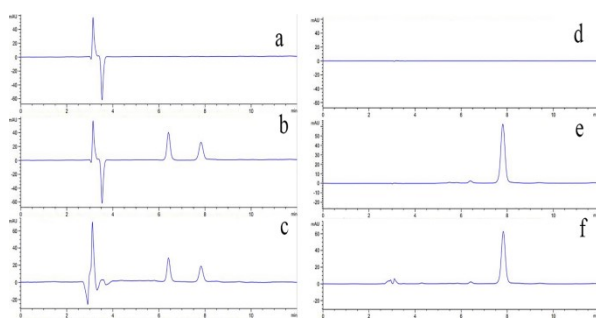

**Fig.S1** The chromatogram of the blank solution (a), the mixed reference solution (b,  $20 \mu\text{g mL}^{-1}$ ), and spiked sample solution (c,  $20 \mu\text{g mL}^{-1}$ ) for BA at 230 nm; The blank solution (d), the mixed reference solution (e,  $20 \mu\text{g mL}^{-1}$ ), and spiked sample solution (f,  $20 \mu\text{g mL}^{-1}$ ) for SA at 260 nm
